# Supplementary material
Source: PubMed Central journal article supplement (PMC2732808)
Supplement: 0903433106_0903433106SI.pdf [file 0903433106_0903433106SI.pdf]

# Supporting Information

Rackovsky 10.1073/pnas.0903433106

**Table S1. The 10 property factors**

1. Alpha-helix/bend preference
2. Side-chain size
3. Extended structure preference
4. Hydrophobicity
5. Double-bend preference
6. Amino acid composition
7. Flat extended preference
8. Occurrence in  $\alpha$  region
9. pK
10. Surrounding hydrophobicity

---

The first 4 property factors correspond essentially to single amino acid physical properties. The remaining 6 factors are superpositions of several physical properties and for convenience are identified by the property making the greatest contribution to the factor.

Table S2. The 59 CAT groups

| C | A   | T     | Number of sequences | CATH group name                                                               |
|---|-----|-------|---------------------|-------------------------------------------------------------------------------|
| 1 | 20  | 5     | 39                  | Single alpha-helices involved in coiled coils or other helix-helix interfaces |
| 1 | 50  | 10    | 31                  | Glycosyltransferase                                                           |
| 1 | 20  | 58    | 38                  | Methane monooxygenase Hydroxylase, chain G, domain 1                          |
| 1 | 10  | 238   | 67                  | Recoverin, domain 1                                                           |
| 1 | 10  | 490   | 32                  | Globin-like                                                                   |
| 1 | 10  | 287   | 53                  | Helix hairpins                                                                |
| 1 | 10  | 8     | 40                  | Helicase, ruva protein, domain 3                                              |
| 1 | 20  | 1,050 | 29                  | Glutathione S-transferase Yfyf (class Pi), chain A, domain 2                  |
| 1 | 20  | 1,250 | 27                  | Growth hormone, chain A                                                       |
| 1 | 10  | 472   | 20                  | Cyclin A, domain 1                                                            |
| 1 | 10  | 760   | 33                  | Cytochrome Bc1 complex, chain D, domain 2                                     |
| 1 | 20  | 120   | 54                  | Four-helix bundle [hemerythrin (Met), subunit A]                              |
| 1 | 10  | 10    | 150                 | Arc repressor mutant, subunit A                                               |
| 1 | 10  | 150   | 54                  | DNA polymerase, domain 1                                                      |
| 1 | 25  | 40    | 67                  | Serine threonine protein phosphatase 5, tetratricopeptide repeat              |
| 1 | 10  | 510   | 28                  | Transferase (phosphotransferase), domain 1                                    |
| 2 | 40  | 50    | 125                 | OB fold (dihydrolipoamide acetyltransferase, E2P)                             |
| 2 | 130 | 10    | 30                  | Methylamine dehydrogenase, chain H                                            |
| 2 | 40  | 30    | 36                  | Elongation factor Tu (Ef-tu), domain 3                                        |
| 2 | 120 | 10    | 20                  | Neuraminidase                                                                 |
| 2 | 40  | 128   | 36                  | Lipocalin                                                                     |
| 2 | 160 | 20    | 22                  | Pectate lyase C-like                                                          |
| 2 | 30  | 29    | 38                  | PH domain-like                                                                |
| 2 | 30  | 42    | 37                  | Pdz3 domain                                                                   |
| 2 | 40  | 70    | 30                  | Cathepsin D, subunit A, domain 1                                              |
| 2 | 80  | 10    | 36                  | Trefoil (acidic fibroblast growth factor, subunit A)                          |
| 2 | 60  | 40    | 423                 | Immunoglobulin-like                                                           |
| 2 | 60  | 120   | 209                 | Jelly rolls                                                                   |
| 2 | 40  | 10    | 95                  | Thrombin, subunit H                                                           |
| 2 | 30  | 30    | 83                  | SH3-type barrels                                                              |
| 3 | 90  | 190   | 22                  | Protein-tyrosine phosphatase; chain A                                         |
| 3 | 30  | 390   | 28                  | Enolase-like, domain 1                                                        |
| 3 | 30  | 360   | 20                  | Dihydrodipicolinate Reductase, domain 2                                       |
| 3 | 10  | 50    | 20                  | Chitinase A, domain 3                                                         |
| 3 | 40  | 630   | 47                  | Aminopeptidase                                                                |
| 3 | 40  | 1,190 | 21                  | UDP-N-acetylmuramoyl-L-alanine:D-glutamate ligase                             |
| 3 | 10  | 180   | 22                  | 2,3-Dihydroxybiphenyl 1,2-dioxygenase, domain 1                               |
| 3 | 50  | 50    | 46                  | FAD/NAD(P)-binding domain                                                     |
| 3 | 30  | 1,330 | 22                  | 60 s ribosomal protein L30, chain A                                           |
| 3 | 60  | 20    | 30                  | Glutamine phosphoribosylpyrophosphate, subunit 1, domain 1                    |
| 3 | 90  | 550   | 21                  | Spore coat polysaccharide biosynthesis protein SpsA, chain A                  |
| 3 | 30  | 230   | 24                  | Ribosomal protein S5, domain 2                                                |
| 3 | 10  | 450   | 47                  | Nuclear transport factor 2, chain A                                           |
| 3 | 40  | 30    | 71                  | Glutaredoxin                                                                  |
| 3 | 30  | 505   | 20                  | SHC adaptor protein                                                           |
| 3 | 30  | 470   | 23                  | D-amino acid aminotransferase, chain A, domain 1                              |
| 3 | 30  | 200   | 48                  | Phosphorylase kinase, domain 1                                                |
| 3 | 40  | 50    | 944                 | Rossmann fold                                                                 |
| 3 | 30  | 1,490 | 27                  | DNA ligase, domain 1                                                          |
| 3 | 20  | 20    | 247                 | TIM barrel                                                                    |
| 3 | 30  | 70    | 193                 | Alpha-beta plaits                                                             |
| 3 | 30  | 300   | 28                  | GMP synthetase, chain A, domain 3                                             |
| 3 | 30  | 420   | 52                  | Nucleotidyltransferase, domain 5                                              |
| 3 | 10  | 100   | 29                  | Mannose-binding protein A, chain A                                            |
| 3 | 40  | 640   | 40                  | Aspartate aminotransferase, domain 2                                          |
| 3 | 10  | 20    | 83                  | Ubiquitin-like (UB roll)                                                      |
| 3 | 40  | 190   | 83                  | D-maltodextrin-binding protein, domain 2                                      |
| 3 | 90  | 1,150 | 42                  | Aspartate aminotransferase, domain 1                                          |
| 3 | 30  | 450   | 37                  | Beta-lactamase                                                                |

**Table S3. The separating hyperplanes**

|                 | H(1,3) | H(2,3) |
|-----------------|--------|--------|
| w <sub>0</sub>  | -0.048 | -0.021 |
| w <sub>1</sub>  | 0.025  | 0.118  |
| w <sub>2</sub>  | -0.031 | -0.014 |
| w <sub>3</sub>  | -0.222 | 0.064  |
| w <sub>4</sub>  | 0.091  | 0.135  |
| w <sub>5</sub>  | 0.052  | 0.059  |
| w <sub>6</sub>  | -0.116 | -0.039 |
| w <sub>7</sub>  | 0.049  | -0.119 |
| w <sub>8</sub>  | -0.197 | -0.125 |
| w <sub>9</sub>  | -0.001 | -0.128 |
| w <sub>10</sub> | -0.067 | 0.017  |

The hyperplane  $H(i,j)$  separates regions occupied predominantly by CAT groups with C values  $i$  and  $j$ . The hyperplanes have the general form  $H(i,j) = w_0 + \sum_{n=1}^{10} w_n \langle f^{(n)} \rangle$

Table S4. The 60 CAT groups

| C | A   | T     | Number of sequences | CATH group name                                                           |
|---|-----|-------|---------------------|---------------------------------------------------------------------------|
| 1 | 10  | 220   | 14                  | Annexin V, domain 1                                                       |
| 1 | 10  | 565   | 16                  | Retinoid X receptor                                                       |
| 1 | 10  | 418   | 13                  | Actin-binding protein, T-fimbrin, domain 1                                |
| 1 | 10  | 260   | 14                  | 434 repressor (amino-terminal domain)                                     |
| 1 | 20  | 140   | 11                  | Butyryl-CoA dehydrogenase, subunit A, domain 3                            |
| 1 | 20  | 1,260 | 14                  | Ferritin                                                                  |
| 1 | 10  | 630   | 15                  | Cytochrome P450                                                           |
| 1 | 10  | 1,040 | 12                  | N-(1-d-carboxylethyl)-l-norvaline dehydrogenase, domain 2                 |
| 1 | 25  | 10    | 14                  | Leucine-rich repeat variant                                               |
| 1 | 10  | 20    | 18                  | Histone, subunit A                                                        |
| 1 | 10  | 1,200 | 14                  | Nonribosomal peptide synthetase peptidyl carrier protein, chain A         |
| 1 | 10  | 530   | 11                  | Lysozyme                                                                  |
| 1 | 10  | 246   | 14                  | Serum albumin, chain A, domain 1                                          |
| 1 | 10  | 533   | 15                  | Death domain, Fas                                                         |
| 2 | 60  | 20    | 12                  | Gamma-B crystallin, domain 1                                              |
| 2 | 30  | 110   | 10                  | Pnp oxidase, chain A                                                      |
| 2 | 60  | 200   | 13                  | Tumor suppressor Smad4                                                    |
| 2 | 30  | 40    | 12                  | Urease, subunit C, domain 1                                               |
| 2 | 10  | 70    | 16                  | Complement module, domain 1                                               |
| 2 | 70  | 98    | 16                  | Beta-galactosidase, chain A, domain 5                                     |
| 2 | 10  | 60    | 12                  | CD59                                                                      |
| 2 | 30  | 39    | 15                  | Alpha-1-antitrypsin, domain 1                                             |
| 2 | 160 | 10    | 12                  | UDP N-acetylglucosamine acyltransferase, domain 1                         |
| 2 | 40  | 40    | 14                  | Barwin-like endoglucanases                                                |
| 2 | 10  | 90    | 13                  | Cystine knot cytokines, subunit B                                         |
| 3 | 10  | 310   | 10                  | Diaminopimelate epimerase, chain A, domain 1                              |
| 3 | 60  | 15    | 13                  | Metallo-beta-lactamase, chain A                                           |
| 3 | 40  | 1,280 | 13                  | Alpha/beta knot                                                           |
| 3 | 30  | 110   | 12                  | Translation initiation factor IF3                                         |
| 3 | 30  | 1,370 | 16                  | Ribosomal protein S8, chain A, domain 1                                   |
| 3 | 40  | 250   | 13                  | Oxidized rhodanese, domain 1                                              |
| 3 | 90  | 79    | 14                  | Nucleoside triphosphate pyrophosphohydrolase                              |
| 3 | 30  | 310   | 13                  | TATA-binding protein                                                      |
| 3 | 90  | 180   | 16                  | Quinine oxidoreductase, chain A, domain 1                                 |
| 3 | 30  | 365   | 13                  | Aldehyde oxidoreductase, domain 4                                         |
| 3 | 90  | 110   | 12                  | L-2-hydroxyisocaproate dehydrogenase, chain A, domain 2                   |
| 3 | 30  | 830   | 11                  | Cytochrome Bc1 complex, chain A, domain 1                                 |
| 3 | 30  | 497   | 11                  | Antithrombin, chain I, domain 2                                           |
| 3 | 40  | 430   | 10                  | Dihydrofolate reductase, subunit A                                        |
| 3 | 40  | 710   | 19                  | Beta-lactamase                                                            |
| 3 | 60  | 21    | 12                  | Purple acid phosphatase, chain A, domain 2                                |
| 3 | 30  | 160   | 14                  | Double-stranded RNA-binding domain                                        |
| 3 | 10  | 28    | 13                  | Endonuclease I-crel                                                       |
| 3 | 40  | 47    | 15                  | Peroxisomal thiolase, chain A, domain 1                                   |
| 3 | 40  | 192   | 10                  | Leucine dehydrogenase, chain A, domain 1                                  |
| 3 | 30  | 930   | 18                  | BirA bifunctional protein, domain 2                                       |
| 3 | 30  | 500   | 11                  | Murine class I major histocompatibility complex, H2-DB, chain A, domain 1 |
| 3 | 30  | 1,360 | 18                  | Gyrase A, domain 2                                                        |
| 3 | 80  | 10    | 15                  | Leucine-rich repeat, LRR (right-handed beta-alpha superhelix)             |
| 3 | 40  | 140   | 11                  | Cytidine deaminase, domain 2                                              |
| 3 | 90  | 70    | 15                  | Cathepsin B, chain A                                                      |
| 3 | 90  | 10    | 15                  | Cytochrome C3                                                             |
| 3 | 90  | 226   | 16                  | 2-enoyl-CoA hydratase, chain A, domain 1                                  |
| 3 | 40  | 20    | 12                  | Severin                                                                   |
| 3 | 30  | 40    | 18                  | Herpes virus 1                                                            |
| 3 | 30  | 565   | 15                  | Heat shock protein 90                                                     |
| 3 | 90  | 1,170 | 12                  | Aldehyde oxidoreductase, domain 3                                         |
| 3 | 90  | 25    | 10                  | UDP-galactose 4-epimerase, domain 1                                       |
| 3 | 10  | 129   | 19                  | Thiol ester dehydrase, chain A                                            |
| 3 | 40  | 390   | 16                  | Collagenase (C)                                                           |
